# Supplementary material for: Optimized design parameters for CRISPR Cas9 and Cas12a homology-directed repair
Source: PubMed Central journal article supplement (PMC8484621; doi:10.1038/s41598-021-98965-y), 2021-09-30
Supplement: 41598_2021_98965_MOESM2_ESM.pdf [file 41598_2021_98965_MOESM2_ESM.pdf]

**Supplemental Data Set**

**Optimized design parameters for CRISPR Cas9 and Cas12a homology-directed repair**

Mollie S. Schubert<sup>1</sup>, Bernice Thommandru<sup>1</sup>, Jessica Woodley<sup>1</sup>, Rolf Turk<sup>1</sup>, Shuqi Yan<sup>1,2</sup>, Gavin Kurgan<sup>1</sup>, Matthew S. McNeill<sup>1</sup> and Garrett R. Rettig<sup>1,\*</sup>

<sup>1</sup> Integrated DNA Technologies, Inc., Coralville, IA, 52241, USA

<sup>2</sup> Present address: BGI Genomics, BGI-Shenzhen, Shenzhen 518083, China.
